# Supplementary material for: Exploring Cold Hardiness within a Butterfly Clade: Supercooling Ability and Polyol Profiles in European Satyrinae
Source: MDPI journal article supplement (doi:10.3390/insects13040369), 2022-04-09

Supplementary material for

# Exploring cold hardiness within a butterfly clade: supercooling ability and polyol profiles in European Satyrinae

By Pavel Vrba, Alena Sucháčková Bartoňová, Miloš Andres, Oldřich Nedvěd, Petr Šimek and Martin Konvička

**Supplementary Table S1.** Measured supercooling points (SCP) of all Satyrinae larvae assayed in this study, with information of survival or death after body fluids freezing.

| Species                     | treatment | SCP (°C) | Survived the freezing |
|-----------------------------|-----------|----------|-----------------------|
| <i>Coenonympha arcania</i>  | Autumn    | -19.3    | no                    |
| <i>Coenonympha arcania</i>  | Autumn    | -20.0    | no                    |
| <i>Coenonympha arcania</i>  | Autumn    | -19.2    | no                    |
| <i>Coenonympha arcania</i>  | Autumn    | -17.0    | no                    |
| <i>Coenonympha arcania</i>  | Autumn    | -22.8    | no                    |
| <i>Coenonympha arcania</i>  | Autumn    | -20.1    | no                    |
| <i>Coenonympha arcania</i>  | Autumn    | -20.9    | no                    |
| <i>Coenonympha arcania</i>  | Autumn    | -18.6    | no                    |
| <i>Coenonympha arcania</i>  | Autumn    | -22.7    | no                    |
| <i>Coenonympha arcania</i>  | Autumn    | -19.7    | no                    |
| <i>Coenonympha arcania</i>  | Autumn    | -23.6    | no                    |
| <i>Coenonympha arcania</i>  | Autumn    | -18.9    | no                    |
| <i>Coenonympha arcania</i>  | Autumn    | -19.8    | no                    |
| <i>Coenonympha arcania</i>  | Autumn    | -21.9    | no                    |
| <i>Coenonympha arcania</i>  | Autumn    | -20.4    | no                    |
| <i>Coenonympha arcania</i>  | Autumn    | -20.1    | no                    |
| <i>Coenonympha gardetta</i> | Autumn    | -20.9    | no                    |
| <i>Coenonympha gardetta</i> | Autumn    | -21.7    | no                    |
| <i>Coenonympha gardetta</i> | Autumn    | -19.8    | no                    |
| <i>Coenonympha gardetta</i> | Autumn    | -22.2    | no                    |
| <i>Coenonympha gardetta</i> | Autumn    | -21.9    | no                    |
| <i>Coenonympha gardetta</i> | Autumn    | -23.7    | no                    |
| <i>Coenonympha gardetta</i> | Autumn    | -22.1    | no                    |
| <i>Coenonympha gardetta</i> | Autumn    | -21.9    | no                    |
| <i>Coenonympha gardetta</i> | Autumn    | -23.0    | no                    |
| <i>Coenonympha gardetta</i> | Autumn    | -20.8    | no                    |
| <i>Coenonympha gardetta</i> | Autumn    | -19.3    | no                    |
| <i>Coenonympha gardetta</i> | Autumn    | -23.5    | no                    |
| <i>Coenonympha gardetta</i> | Autumn    | -21.4    | no                    |
| <i>Coenonympha gardetta</i> | Autumn    | -21.7    | no                    |
| <i>Coenonympha gardetta</i> | Autumn    | -21.9    | no                    |
| <i>Coenonympha gardetta</i> | Autumn    | -23.2    | no                    |
| <i>Maniola jurtina</i>      | Autumn    | -15.1    | no                    |
| <i>Maniola jurtina</i>      | Autumn    | -12.8    | no                    |
| <i>Maniola jurtina</i>      | Autumn    | -15.0    | no                    |
| <i>Maniola jurtina</i>      | Autumn    | -12.9    | no                    |

|                              |        |       |     |
|------------------------------|--------|-------|-----|
| <i>Maniola jurtina</i>       | Autumn | -7.2  | yes |
| <i>Maniola jurtina</i>       | Autumn | -6.4  | yes |
| <i>Maniola jurtina</i>       | Autumn | -7.0  | yes |
| <i>Maniola jurtina</i>       | Autumn | -13.3 | no  |
| <i>Maniola jurtina</i>       | Autumn | -5.7  | yes |
| <i>Maniola jurtina</i>       | Autumn | -13.2 | no  |
| <i>Maniola jurtina</i>       | Autumn | -13.4 | no  |
| <i>Maniola jurtina</i>       | Autumn | -6.8  | yes |
| <i>Maniola jurtina</i>       | Autumn | -13.4 | no  |
| <i>Maniola jurtina</i>       | Autumn | -13.0 | no  |
| <i>Maniola jurtina</i>       | Autumn | -13.7 | no  |
| <i>Maniola jurtina</i>       | Autumn | -12.6 | no  |
| <i>Melanargia galathea</i>   | Autumn | -6.6  | no  |
| <i>Melanargia galathea</i>   | Autumn | -7.3  | no  |
| <i>Melanargia galathea</i>   | Autumn | -12.1 | no  |
| <i>Melanargia galathea</i>   | Autumn | -13.7 | no  |
| <i>Melanargia galathea</i>   | Autumn | -8.5  | no  |
| <i>Melanargia galathea</i>   | Autumn | -7.4  | no  |
| <i>Melanargia galathea</i>   | Autumn | -13.7 | no  |
| <i>Melanargia galathea</i>   | Autumn | -14.6 | no  |
| <i>Melanargia galathea</i>   | Autumn | -16.0 | no  |
| <i>Melanargia galathea</i>   | Autumn | -12.7 | no  |
| <i>Melanargia galathea</i>   | Autumn | -8.9  | no  |
| <i>Melanargia galathea</i>   | Autumn | -13.1 | no  |
| <i>Melanargia galathea</i>   | Autumn | -15.9 | no  |
| <i>Melanargia galathea</i>   | Autumn | -7.6  | no  |
| <i>Melanargia galathea</i>   | Autumn | -7.3  | no  |
| <i>Melanargia galathea</i>   | Autumn | -6.9  | no  |
| <i>Aphantopus hyperantus</i> | Autumn | -6.4  | yes |
| <i>Aphantopus hyperantus</i> | Autumn | -7.5  | yes |
| <i>Aphantopus hyperantus</i> | Autumn | -8.0  | yes |
| <i>Aphantopus hyperantus</i> | Autumn | -12.7 | yes |
| <i>Aphantopus hyperantus</i> | Autumn | -10.3 | yes |
| <i>Aphantopus hyperantus</i> | Autumn | -9.7  | yes |
| <i>Aphantopus hyperantus</i> | Autumn | -6.5  | yes |
| <i>Aphantopus hyperantus</i> | Autumn | -7.1  | yes |
| <i>Aphantopus hyperantus</i> | Autumn | -12.7 | yes |
| <i>Aphantopus hyperantus</i> | Autumn | -6.4  | yes |
| <i>Aphantopus hyperantus</i> | Autumn | -7.5  | yes |
| <i>Aphantopus hyperantus</i> | Autumn | -8.1  | yes |
| <i>Aphantopus hyperantus</i> | Autumn | -7.2  | yes |
| <i>Aphantopus hyperantus</i> | Autumn | -14.4 | yes |
| <i>Aphantopus hyperantus</i> | Autumn | -13.4 | yes |
| <i>Aphantopus hyperantus</i> | Autumn | -5.0  | yes |
| <i>Chazara briseis</i>       | Autumn | -21.7 | no  |
| <i>Chazara briseis</i>       | Autumn | -20.3 | no  |
| <i>Chazara briseis</i>       | Autumn | -18.0 | no  |
| <i>Chazara briseis</i>       | Autumn | -25.4 | no  |

|                            |        |       |     |
|----------------------------|--------|-------|-----|
| <i>Chazara briseis</i>     | Autumn | -22.2 | no  |
| <i>Chazara briseis</i>     | Autumn | -19.0 | no  |
| <i>Chazara briseis</i>     | Autumn | -21.1 | no  |
| <i>Chazara briseis</i>     | Autumn | -25.0 | no  |
| <i>Chazara briseis</i>     | Autumn | -22.8 | no  |
| <i>Chazara briseis</i>     | Autumn | -19.8 | no  |
| <i>Chazara briseis</i>     | Autumn | -23.3 | no  |
| <i>Chazara briseis</i>     | Autumn | -20.7 | no  |
| <i>Chazara briseis</i>     | Autumn | -25.0 | no  |
| <i>Chazara briseis</i>     | Autumn | -23.4 | no  |
| <i>Chazara briseis</i>     | Autumn | -18.9 | no  |
| <i>Hipparchia semele</i>   | Autumn | -8.6  | yes |
| <i>Hipparchia semele</i>   | Autumn | -7.9  | yes |
| <i>Hipparchia semele</i>   | Autumn | -8.9  | yes |
| <i>Hipparchia semele</i>   | Autumn | -13.9 | yes |
| <i>Hipparchia semele</i>   | Autumn | -13.9 | yes |
| <i>Hipparchia semele</i>   | Autumn | -8.0  | yes |
| <i>Hipparchia semele</i>   | Autumn | -7.3  | yes |
| <i>Hipparchia semele</i>   | Autumn | -7.0  | yes |
| <i>Hipparchia semele</i>   | Autumn | -12.7 | yes |
| <i>Hipparchia semele</i>   | Autumn | -6.9  | yes |
| <i>Hipparchia semele</i>   | Autumn | -10.0 | yes |
| <i>Hipparchia semele</i>   | Autumn | -12.4 | yes |
| <i>Hipparchia semele</i>   | Autumn | -9.6  | yes |
| <i>Hipparchia semele</i>   | Autumn | -7.0  | yes |
| <i>Hipparchia semele</i>   | Autumn | -11.8 | yes |
| <i>Minois dryas</i>        | Autumn | -24.6 | no  |
| <i>Minois dryas</i>        | Autumn | -20.4 | no  |
| <i>Minois dryas</i>        | Autumn | -26.0 | no  |
| <i>Minois dryas</i>        | Autumn | -22.7 | no  |
| <i>Minois dryas</i>        | Autumn | -7.7  | yes |
| <i>Minois dryas</i>        | Autumn | -22.5 | no  |
| <i>Minois dryas</i>        | Autumn | -18.7 | no  |
| <i>Minois dryas</i>        | Autumn | -27.0 | no  |
| <i>Minois dryas</i>        | Autumn | -25.3 | no  |
| <i>Minois dryas</i>        | Autumn | -23.3 | no  |
| <i>Minois dryas</i>        | Autumn | -7.1  | yes |
| <i>Minois dryas</i>        | Autumn | -22.2 | no  |
| <i>Minois dryas</i>        | Autumn | -23.6 | no  |
| <i>Minois dryas</i>        | Autumn | -21.3 | no  |
| <i>Minois dryas</i>        | Autumn | -21.7 | no  |
| <i>Coenonympha arcania</i> | Winter | -21.1 | no  |
| <i>Coenonympha arcania</i> | Winter | -19.2 | no  |
| <i>Coenonympha arcania</i> | Winter | -19.1 | no  |
| <i>Coenonympha arcania</i> | Winter | -17.4 | no  |
| <i>Coenonympha arcania</i> | Winter | -22.5 | no  |
| <i>Coenonympha arcania</i> | Winter | -22.2 | no  |
| <i>Coenonympha arcania</i> | Winter | -18.8 | no  |

|                              |        |       |     |
|------------------------------|--------|-------|-----|
| <i>Coenonympha arcania</i>   | Winter | -20.1 | no  |
| <i>Coenonympha arcania</i>   | Winter | -21.9 | no  |
| <i>Coenonympha arcania</i>   | Winter | -19.7 | no  |
| <i>Coenonympha arcania</i>   | Winter | -20.6 | no  |
| <i>Coenonympha arcania</i>   | Winter | -21.7 | no  |
| <i>Coenonympha arcania</i>   | Winter | -22.6 | no  |
| <i>Coenonympha arcania</i>   | Winter | -19.4 | no  |
| <i>Coenonympha gardetta</i>  | Winter | -22.1 | no  |
| <i>Coenonympha gardetta</i>  | Winter | -23.1 | no  |
| <i>Coenonympha gardetta</i>  | Winter | -21.2 | no  |
| <i>Coenonympha gardetta</i>  | Winter | -25.4 | no  |
| <i>Coenonympha gardetta</i>  | Winter | -17.0 | no  |
| <i>Coenonympha gardetta</i>  | Winter | -23.4 | no  |
| <i>Coenonympha gardetta</i>  | Winter | -22.9 | no  |
| <i>Coenonympha gardetta</i>  | Winter | -15.1 | no  |
| <i>Coenonympha gardetta</i>  | Winter | -26.6 | no  |
| <i>Coenonympha gardetta</i>  | Winter | -22.8 | no  |
| <i>Coenonympha gardetta</i>  | Winter | -24.9 | no  |
| <i>Coenonympha gardetta</i>  | Winter | -23.5 | no  |
| <i>Coenonympha gardetta</i>  | Winter | -19.5 | no  |
| <i>Coenonympha gardetta</i>  | Winter | -25.5 | no  |
| <i>Coenonympha gardetta</i>  | Winter | -19.0 | no  |
| <i>Coenonympha gardetta</i>  | Winter | -25.7 | no  |
| <i>Melanargia galathea</i>   | Winter | -9.0  | no  |
| <i>Melanargia galathea</i>   | Winter | -8.0  | no  |
| <i>Melanargia galathea</i>   | Winter | -9.6  | no  |
| <i>Melanargia galathea</i>   | Winter | -14.9 | no  |
| <i>Melanargia galathea</i>   | Winter | -13.1 | no  |
| <i>Melanargia galathea</i>   | Winter | -7.4  | no  |
| <i>Melanargia galathea</i>   | Winter | -7.6  | no  |
| <i>Melanargia galathea</i>   | Winter | -15.5 | no  |
| <i>Melanargia galathea</i>   | Winter | -9.1  | no  |
| <i>Melanargia galathea</i>   | Winter | -17.6 | no  |
| <i>Melanargia galathea</i>   | Winter | -8.9  | no  |
| <i>Melanargia galathea</i>   | Winter | -8.7  | no  |
| <i>Melanargia galathea</i>   | Winter | -16.6 | no  |
| <i>Melanargia galathea</i>   | Winter | -12.8 | no  |
| <i>Melanargia galathea</i>   | Winter | -6.4  | no  |
| <i>Melanargia galathea</i>   | Winter | -7.4  | no  |
| <i>Aphantopus hyperantus</i> | Winter | -8.9  | yes |
| <i>Aphantopus hyperantus</i> | Winter | -7.1  | yes |
| <i>Aphantopus hyperantus</i> | Winter | -9.7  | yes |
| <i>Aphantopus hyperantus</i> | Winter | -13.9 | yes |
| <i>Aphantopus hyperantus</i> | Winter | -7.5  | yes |
| <i>Aphantopus hyperantus</i> | Winter | -8.2  | yes |
| <i>Aphantopus hyperantus</i> | Winter | -7.3  | yes |
| <i>Aphantopus hyperantus</i> | Winter | -15.2 | yes |
| <i>Aphantopus hyperantus</i> | Winter | -8.0  | yes |

|                              |        |       |     |
|------------------------------|--------|-------|-----|
| <i>Aphantopus hyperantus</i> | Winter | -8.6  | yes |
| <i>Aphantopus hyperantus</i> | Winter | -14.2 | yes |
| <i>Aphantopus hyperantus</i> | Winter | -8.5  | yes |
| <i>Aphantopus hyperantus</i> | Winter | -8.8  | yes |
| <i>Aphantopus hyperantus</i> | Winter | -9.7  | yes |
| <i>Aphantopus hyperantus</i> | Winter | -9.7  | yes |
| <i>Aphantopus hyperantus</i> | Winter | -8.8  | yes |
| <i>Maniola jurtina</i>       | Winter | -14.3 | no  |
| <i>Maniola jurtina</i>       | Winter | -14.8 | no  |
| <i>Maniola jurtina</i>       | Winter | -19.7 | no  |
| <i>Maniola jurtina</i>       | Winter | -18.2 | no  |
| <i>Maniola jurtina</i>       | Winter | -19.1 | no  |
| <i>Maniola jurtina</i>       | Winter | -18.3 | no  |
| <i>Maniola jurtina</i>       | Winter | -16.6 | no  |
| <i>Maniola jurtina</i>       | Winter | -10.7 | no  |
| <i>Maniola jurtina</i>       | Winter | -16.8 | no  |
| <i>Maniola jurtina</i>       | Winter | -14.1 | no  |
| <i>Maniola jurtina</i>       | Winter | -17.3 | no  |
| <i>Maniola jurtina</i>       | Winter | -19.8 | no  |
| <i>Maniola jurtina</i>       | Winter | -7.8  | yes |
| <i>Maniola jurtina</i>       | Winter | -15.0 | no  |
| <i>Maniola jurtina</i>       | Winter | -11.1 | no  |
| <i>Maniola jurtina</i>       | Winter | -20.5 | no  |
| <i>Hipparchia semele</i>     | Winter | -9.2  | yes |
| <i>Hipparchia semele</i>     | Winter | -9.6  | yes |
| <i>Hipparchia semele</i>     | Winter | -8.3  | yes |
| <i>Hipparchia semele</i>     | Winter | -10.4 | yes |
| <i>Hipparchia semele</i>     | Winter | -9.2  | yes |
| <i>Hipparchia semele</i>     | Winter | -10.3 | yes |
| <i>Hipparchia semele</i>     | Winter | -10.5 | yes |
| <i>Hipparchia semele</i>     | Winter | -12.0 | yes |
| <i>Hipparchia semele</i>     | Winter | -7.8  | yes |
| <i>Hipparchia semele</i>     | Winter | -10.0 | yes |
| <i>Chazara briseis</i>       | Winter | -19.1 | no  |
| <i>Chazara briseis</i>       | Winter | -25.7 | no  |
| <i>Chazara briseis</i>       | Winter | -16.4 | no  |
| <i>Chazara briseis</i>       | Winter | -10.9 | no  |
| <i>Chazara briseis</i>       | Winter | -8.3  | yes |
| <i>Chazara briseis</i>       | Winter | -9.1  | yes |
| <i>Chazara briseis</i>       | Winter | -22.5 | no  |
| <i>Chazara briseis</i>       | Winter | -21.1 | no  |
| <i>Chazara briseis</i>       | Winter | -13.8 | no  |
| <i>Chazara briseis</i>       | Winter | -24.8 | no  |
| <i>Minois dryas</i>          | Winter | -23.1 | no  |
| <i>Minois dryas</i>          | Winter | -23.5 | no  |
| <i>Minois dryas</i>          | Winter | -19.5 | no  |
| <i>Minois dryas</i>          | Winter | -12.3 | no  |
| <i>Minois dryas</i>          | Winter | -18.8 | no  |

|                           |        |       |     |
|---------------------------|--------|-------|-----|
| <i>Minois dryas</i>       | Winter | -26.5 | no  |
| <i>Minois dryas</i>       | Winter | -21.4 | no  |
| <i>Minois dryas</i>       | Winter | -18.5 | no  |
| <i>Erebia medusa</i> 2012 | Autumn | -16.5 | yes |
| <i>Erebia medusa</i> 2012 | Autumn | -15   | yes |
| <i>Erebia medusa</i> 2012 | Autumn | -22   | yes |
| <i>Erebia medusa</i> 2012 | Autumn | -15   | yes |
| <i>Erebia medusa</i> 2012 | Autumn | -21   | yes |
| <i>Erebia medusa</i> 2012 | Autumn | -17   | yes |
| <i>Erebia medusa</i> 2012 | Autumn | -18   | yes |
| <i>Erebia medusa</i> 2012 | Autumn | -14   | yes |
| <i>Erebia medusa</i> 2012 | Autumn | -17   | yes |
| <i>Erebia medusa</i> 2012 | Autumn | -15.5 | yes |
| <i>Erebia medusa</i> 2012 | Autumn | -18   | yes |
| <i>Erebia medusa</i> 2012 | Autumn | -16.5 | yes |
| <i>Erebia medusa</i> 2012 | Autumn | -18.5 | yes |
| <i>Erebia medusa</i> 2012 | Autumn | -13   | yes |
| <i>Erebia medusa</i> 2012 | Autumn | -17   | yes |
| <i>Erebia medusa</i> 2012 | Autumn | -18   | yes |
| <i>Erebia epiphron</i>    | Autumn | -26.5 | no  |
| <i>Erebia epiphron</i>    | Autumn | -20   | no  |
| <i>Erebia epiphron</i>    | Autumn | -26.5 | no  |
| <i>Erebia epiphron</i>    | Autumn | -18.5 | no  |
| <i>Erebia epiphron</i>    | Autumn | -24.5 | no  |
| <i>Erebia epiphron</i>    | Autumn | -15.5 | no  |
| <i>Erebia epiphron</i>    | Autumn | -25.5 | no  |
| <i>Erebia epiphron</i>    | Autumn | -21.5 | no  |
| <i>Erebia epiphron</i>    | Autumn | -22.5 | no  |
| <i>Erebia epiphron</i>    | Autumn | -25   | no  |
| <i>Erebia epiphron</i>    | Autumn | -22.5 | no  |
| <i>Erebia epiphron</i>    | Autumn | -19.5 | no  |
| <i>Erebia epiphron</i>    | Autumn | -24.5 | no  |
| <i>Erebia epiphron</i>    | Autumn | -20.5 | no  |
| <i>Erebia epiphron</i>    | Autumn | -18.5 | no  |
| <i>Erebia epiphron</i>    | Autumn | -21   | no  |
| <i>Erebia sudetica</i>    | Autumn | -22   | no  |
| <i>Erebia sudetica</i>    | Autumn | -7    | no  |
| <i>Erebia sudetica</i>    | Autumn | -15   | no  |
| <i>Erebia sudetica</i>    | Autumn | -9    | no  |
| <i>Erebia sudetica</i>    | Autumn | -9.5  | no  |
| <i>Erebia sudetica</i>    | Autumn | -10   | no  |
| <i>Erebia sudetica</i>    | Autumn | -12.5 | no  |
| <i>Erebia sudetica</i>    | Autumn | -15   | no  |
| <i>Erebia sudetica</i>    | Autumn | -16.5 | no  |
| <i>Erebia sudetica</i>    | Autumn | -17.5 | no  |
| <i>Erebia sudetica</i>    | Autumn | -20   | no  |
| <i>Erebia sudetica</i>    | Autumn | -15   | no  |
| <i>Erebia sudetica</i>    | Autumn | -16   | no  |

|                           |        |       |     |
|---------------------------|--------|-------|-----|
| <i>Erebia sudetica</i>    | Autumn | -17   | no  |
| <i>Erebia sudetica</i>    | Autumn | -19.5 | no  |
| <i>Erebia sudetica</i>    | Autumn | -20   | no  |
| <i>Erebia tyndarus</i>    | Autumn | -5.5  | no  |
| <i>Erebia tyndarus</i>    | Autumn | -8    | no  |
| <i>Erebia tyndarus</i>    | Autumn | -5.5  | no  |
| <i>Erebia tyndarus</i>    | Autumn | -9.5  | no  |
| <i>Erebia tyndarus</i>    | Autumn | -8.5  | no  |
| <i>Erebia tyndarus</i>    | Autumn | -11   | no  |
| <i>Erebia tyndarus</i>    | Autumn | -7    | no  |
| <i>Erebia tyndarus</i>    | Autumn | -11   | no  |
| <i>Erebia tyndarus</i>    | Autumn | -6    | no  |
| <i>Erebia tyndarus</i>    | Autumn | -15   | no  |
| <i>Erebia tyndarus</i>    | Autumn | -8.5  | no  |
| <i>Erebia tyndarus</i>    | Autumn | -6    | no  |
| <i>Erebia tyndarus</i>    | Autumn | -5.5  | no  |
| <i>Erebia tyndarus</i>    | Autumn | -12.5 | no  |
| <i>Erebia tyndarus</i>    | Autumn | -8.5  | no  |
| <i>Erebia tyndarus</i>    | Autumn | -6.5  | no  |
| <i>Erebia medusa 2017</i> | Autumn | -8.4  | yes |
| <i>Erebia medusa 2017</i> | Autumn | -8.3  | yes |
| <i>Erebia medusa 2017</i> | Autumn | -13.8 | yes |
| <i>Erebia medusa 2017</i> | Autumn | -7.8  | yes |
| <i>Erebia medusa 2017</i> | Autumn | -15.4 | yes |
| <i>Erebia medusa 2017</i> | Autumn | -11.9 | yes |
| <i>Erebia medusa 2017</i> | Autumn | -8.1  | yes |
| <i>Erebia medusa 2017</i> | Autumn | -8.8  | yes |
| <i>Erebia medusa 2017</i> | Autumn | -12.7 | yes |
| <i>Erebia medusa 2017</i> | Autumn | -8.4  | yes |
| <i>Erebia medusa 2017</i> | Autumn | -6.9  | yes |
| <i>Erebia medusa 2017</i> | Autumn | -11.8 | yes |
| <i>Erebia medusa 2017</i> | Autumn | -14.4 | yes |
| <i>Erebia medusa 2017</i> | Autumn | -11.4 | yes |
| <i>Erebia medusa 2017</i> | Autumn | -11.9 | yes |
| <i>Erebia medusa 2017</i> | Autumn | -13.3 | yes |
| <i>Erebia medusa 2017</i> | Winter | -8.4  | yes |
| <i>Erebia medusa 2017</i> | Winter | -16.3 | yes |
| <i>Erebia medusa 2017</i> | Winter | -19.1 | yes |
| <i>Erebia medusa 2017</i> | Winter | -6.2  | yes |
| <i>Erebia medusa 2017</i> | Winter | -8.2  | yes |
| <i>Erebia medusa 2017</i> | Winter | -8.1  | yes |
| <i>Erebia medusa 2017</i> | Winter | -8.8  | yes |
| <i>Erebia medusa 2017</i> | Winter | -7.9  | yes |
| <i>Erebia medusa 2017</i> | Winter | -18.0 | yes |
| <i>Erebia medusa 2017</i> | Winter | -7.9  | yes |
| <i>Erebia medusa 2017</i> | Winter | -11.5 | yes |
| <i>Erebia medusa 2017</i> | Winter | -7.5  | yes |
| <i>Erebia medusa 2017</i> | Winter | -21.8 | yes |

|                           |        |       |     |
|---------------------------|--------|-------|-----|
| <i>Erebia medusa</i> 2017 | Winter | -21.1 | yes |
| <i>Erebia medusa</i> 2017 | Winter | -7.3  | yes |
| <i>Erebia medusa</i> 2017 | Winter | -6.1  | yes |
| <i>Erebia aethiops</i>    | Autumn | -7.6  | yes |
| <i>Erebia aethiops</i>    | Autumn | -12.7 | yes |
| <i>Erebia aethiops</i>    | Autumn | -10.1 | yes |
| <i>Erebia aethiops</i>    | Autumn | -12.4 | yes |
| <i>Erebia aethiops</i>    | Autumn | -7.8  | yes |
| <i>Erebia aethiops</i>    | Autumn | -12.1 | no  |
| <i>Erebia aethiops</i>    | Autumn | -23.3 | no  |
| <i>Erebia aethiops</i>    | Autumn | -19.2 | no  |
| <i>Erebia aethiops</i>    | Autumn | -16.2 | no  |
| <i>Erebia aethiops</i>    | Autumn | -17.1 | no  |
| <i>Erebia aethiops</i>    | Autumn | -12.3 | no  |
| <i>Erebia aethiops</i>    | Autumn | -15.8 | no  |
| <i>Erebia aethiops</i>    | Autumn | -18.8 | no  |
| <i>Erebia aethiops</i>    | Autumn | -23   | no  |
| <i>Erebia aethiops</i>    | Autumn | -22.6 | no  |
| <i>Erebia aethiops</i>    | Autumn | -17.1 | no  |
| <i>Erebia aethiops</i>    | Winter | -18.8 | no  |
| <i>Erebia aethiops</i>    | Winter | -18.9 | no  |
| <i>Erebia aethiops</i>    | Winter | -22.9 | no  |
| <i>Erebia aethiops</i>    | Winter | -19.1 | no  |
| <i>Erebia aethiops</i>    | Winter | -18.1 | no  |
| <i>Erebia aethiops</i>    | Winter | -15.5 | no  |
| <i>Erebia aethiops</i>    | Winter | -22.9 | no  |
| <i>Erebia aethiops</i>    | Winter | -22.7 | no  |
| <i>Erebia aethiops</i>    | Winter | -10.1 | yes |
| <i>Erebia aethiops</i>    | Winter | -12.6 | yes |
| <i>Erebia aethiops</i>    | Winter | -13.7 | no  |
| <i>Erebia aethiops</i>    | Winter | -7.2  | no  |
| <i>Erebia aethiops</i>    | Winter | -8.4  | no  |
| <i>Erebia aethiops</i>    | Winter | -8.6  | no  |
| <i>Erebia aethiops</i>    | Winter | -19.7 | no  |
| <i>Erebia aethiops</i>    | Winter | -8.3  | yes |
| <i>Erebia pronoe</i>      | Autumn | -13.6 | no  |
| <i>Erebia pronoe</i>      | Autumn | -23.5 | no  |
| <i>Erebia pronoe</i>      | Autumn | -15.2 | no  |
| <i>Erebia pronoe</i>      | Autumn | -12.1 | no  |
| <i>Erebia pronoe</i>      | Autumn | -18.3 | no  |
| <i>Erebia pronoe</i>      | Autumn | -19.0 | no  |
| <i>Erebia pronoe</i>      | Autumn | -13.9 | no  |
| <i>Erebia pronoe</i>      | Autumn | -13.9 | no  |
| <i>Erebia pronoe</i>      | Autumn | -25.9 | no  |
| <i>Erebia pronoe</i>      | Autumn | -18.3 | no  |
| <i>Erebia pronoe</i>      | Autumn | -22.9 | no  |
| <i>Erebia pronoe</i>      | Autumn | -20.4 | no  |
| <i>Erebia pronoe</i>      | Autumn | -19.2 | no  |



|                        |        |       |    |
|------------------------|--------|-------|----|
| <i>Erebia pronoe</i>   | Autumn | -24.8 | no |
| <i>Erebia pronoe</i>   | Autumn | -15.1 | no |
| <i>Erebia pronoe</i>   | Autumn | -23.8 | no |
| <i>Erebia pronoe</i>   | Winter | -9.5  | no |
| <i>Erebia pronoe</i>   | Winter | -24.4 | no |
| <i>Erebia pronoe</i>   | Winter | -16.8 | no |
| <i>Erebia pronoe</i>   | Winter | -12.0 | no |
| <i>Erebia pronoe</i>   | Winter | -4.8  | no |
| <i>Erebia pronoe</i>   | Winter | -8.2  | no |
| <i>Erebia tyndarus</i> | Autumn | -25.3 | no |
| <i>Erebia tyndarus</i> | Autumn | -24.6 | no |
| <i>Erebia tyndarus</i> | Autumn | -23.1 | no |
| <i>Erebia tyndarus</i> | Autumn | -23.3 | no |
| <i>Erebia tyndarus</i> | Autumn | -24.1 | no |
| <i>Erebia tyndarus</i> | Autumn | -24.2 | no |
| <i>Erebia tyndarus</i> | Autumn | -26.1 | no |
| <i>Erebia tyndarus</i> | Autumn | -15.3 | no |
| <i>Erebia tyndarus</i> | Autumn | -23.7 | no |
| <i>Erebia tyndarus</i> | Autumn | -18.4 | no |
| <i>Erebia tyndarus</i> | Autumn | -23.4 | no |
| <i>Erebia tyndarus</i> | Autumn | -22.2 | no |
| <i>Erebia tyndarus</i> | Autumn | -19.5 | no |
| <i>Erebia tyndarus</i> | Autumn | -17.2 | no |
| <i>Erebia tyndarus</i> | Autumn | -23.1 | no |
| <i>Erebia tyndarus</i> | Autumn | -14.1 | no |
| <i>Erebia tyndarus</i> | Winter | -19.5 | no |
| <i>Erebia tyndarus</i> | Winter | -13.8 | no |
| <i>Erebia tyndarus</i> | Winter | -17.0 | no |
| <i>Erebia tyndarus</i> | Winter | -18.5 | no |
| <i>Erebia tyndarus</i> | Winter | -11.5 | no |
| <i>Erebia tyndarus</i> | Winter | -17.2 | no |
| <i>Erebia tyndarus</i> | Winter | -24.8 | no |
| <i>Erebia tyndarus</i> | Winter | -15.9 | no |
| <i>Erebia tyndarus</i> | Winter | -16.2 | no |
| <i>Erebia tyndarus</i> | Winter | -19.9 | no |
| <i>Erebia tyndarus</i> | Winter | -21.7 | no |
| <i>Erebia tyndarus</i> | Winter | -19.4 | no |
| <i>Erebia tyndarus</i> | Winter | -24.9 | no |
| <i>Erebia tyndarus</i> | Winter | -25.3 | no |
| <i>Erebia pluto</i>    | Autumn | -7.4  | no |
| <i>Erebia pluto</i>    | Autumn | -15.8 | no |
| <i>Erebia pluto</i>    | Autumn | -17.5 | no |
| <i>Erebia pluto</i>    | Autumn | -21.6 | no |
| <i>Erebia pluto</i>    | Autumn | -8.2  | no |
| <i>Erebia pluto</i>    | Autumn | -9.1  | no |
| <i>Erebia pluto</i>    | Autumn | -8.6  | no |
| <i>Erebia pluto</i>    | Autumn | -18.2 | no |
| <i>Erebia pluto</i>    | Autumn | -14.6 | no |

|                     |        |       |    |
|---------------------|--------|-------|----|
| <i>Erebia pluto</i> | Autumn | -17.0 | no |
| <i>Erebia pluto</i> | Autumn | -24.9 | no |
| <i>Erebia pluto</i> | Autumn | -10.1 | no |
| <i>Erebia pluto</i> | Autumn | -16.3 | no |
| <i>Erebia pluto</i> | Autumn | -16.7 | no |
| <i>Erebia pluto</i> | Autumn | -25.9 | no |
| <i>Erebia pluto</i> | Autumn | -24.3 | no |

**Supplementary Table S2.** Results of post-hoc Tukey's HSD tests used for multiple comparisons of SCP (**supercooling points, bold triangle**) and *TSPC* (*total sugars and polyols concentrations, triangle in italics*) measured on overwintering larvae of eight European monovoltine Satyrinae butterflies, obtained from ANOVA analysis with factors species and treatment (A and W: Autumn and Winter).

|                      |   | <i>C. arcania</i> |             | <i>C. gardetta</i> |             | <i>M. jurtina</i> |             | <i>A. hyperantus</i> |             | <i>M. galathea</i> |             | <i>M. dryas</i> |             | <i>H. semele</i> |             | <i>C. briseis</i> |             |
|----------------------|---|-------------------|-------------|--------------------|-------------|-------------------|-------------|----------------------|-------------|--------------------|-------------|-----------------|-------------|------------------|-------------|-------------------|-------------|
|                      |   | A                 | W           | A                  | W           | A                 | W           | A                    | W           | A                  | W           | A               | W           | A                | W           | A                 | W           |
| <i>C. arcania</i>    | A |                   | <b>1.00</b> | <b>0.99</b>        | <b>0.94</b> | *                 | ****        | ****                 | ****        | ****               | ****        | <b>0.99</b>     | <b>0.60</b> | ****             | ****        | <b>1.00</b>       | <b>1.00</b> |
|                      | W | <i>1.00</i>       |             | <b>0.99</b>        | <b>0.98</b> | *                 | ****        | ****                 | ****        | ****               | ****        | <b>0.99</b>     | <b>0.57</b> | ****             | ****        | <b>1.00</b>       | <b>1.00</b> |
| <i>C. gardetta</i>   | A | **                | <i>0.11</i> |                    | <b>1.00</b> | ****              | ****        | ****                 | ****        | ****               | ****        | <b>1.00</b>     | *           | ****             | ****        | <b>1.00</b>       | <b>0.99</b> |
|                      | W | <i>1.00</i>       | <i>1.00</i> | <i>0.33</i>        |             | ****              | ****        | ****                 | ****        | ****               | ****        | <b>1.00</b>     | *           | ****             | ****        | <b>0.99</b>       | <b>0.99</b> |
| <i>M. jurtina</i>    | A | <i>0.95</i>       | <i>0.99</i> | <i>0.67</i>        | <i>1.00</i> |                   | <b>1.00</b> | <b>1.00</b>          | <b>1.00</b> | <b>0.80</b>        | <b>0.99</b> | ****            | **          | <b>0.99</b>      | <b>0.99</b> | ****              | ****        |
|                      | W | <i>0.72</i>       | <i>0.99</i> | <i>0.92</i>        | <i>1.00</i> | <i>1.00</i>       |             | **                   | **          | ****               | ****        | **              | <b>0.99</b> | ****             | ***         | **                | <b>0.11</b> |
| <i>A. hyperantus</i> | A | ****              | ***         | <i>0.90</i>        | ***         | **                | *           |                      | <b>1.00</b> | <b>0.98</b>        | <b>0.99</b> | ****            | ****        | <b>0.99</b>      | <b>0.99</b> | ****              | ****        |
|                      | W | <i>0.10</i>       | <i>0.55</i> | <i>1.00</i>        | <i>0.86</i> | <i>0.99</i>       | <i>0.99</i> | <i>0.40</i>          |             | <b>0.97</b>        | <b>0.99</b> | ****            | ***         | <b>0.99</b>      | <b>1.00</b> | ****              | ****        |
| <i>M. galathea</i>   | A | ****              | ****        | ****               | ****        | ****              | ****        | ****                 | ****        |                    | <b>1.00</b> | ****            | ****        | <b>0.99</b>      | <b>1.00</b> | ****              | ****        |
|                      | W | <i>0.10</i>       | <i>0.54</i> | <i>1.00</i>        | <i>0.86</i> | <i>0.98</i>       | <i>0.99</i> | <i>0.41</i>          | <i>1.00</i> | ****               |             | ****            | ****        | <b>1.00</b>      | <b>1.00</b> | ****              | ****        |
| <i>M. dryas</i>      | A | ****              | ****        | ****               | ****        | ****              | ****        | ****                 | ****        | <i>0.24</i>        | ****        |                 | <b>0.06</b> | ****             | ****        | <b>1.00</b>       | <b>0.99</b> |
|                      | W | ****              | ****        | <i>0.17</i>        | ****        | ****              | ***         | <i>0.97</i>          | *           | ****               | *           | ***             |             | ****             | ***         | <b>0.29</b>       | <b>0.79</b> |
| <i>H. semele</i>     | A | <i>0.07</i>       | <i>0.44</i> | <i>1.00</i>        | <i>0.78</i> | <i>0.97</i>       | <i>0.99</i> | <i>0.50</i>          | <i>1.00</i> | ****               | <i>1.00</i> | ****            | *           |                  | <b>1.00</b> | ****              | ****        |
|                      | W | <i>0.0002</i>     | **          | <i>1.00</i>        | *           | <i>0.12</i>       | <i>0.35</i> | <i>0.99</i>          | <i>0.96</i> | ****               | <i>0.96</i> | ****            | <i>0.72</i> | <i>0.98</i>      |             | ****              | ****        |
| <i>C. briseis</i>    | A | ***               | *           | <i>1.00</i>        | <i>0.10</i> | <i>0.31</i>       | <i>0.64</i> | <i>0.99</i>          | <i>0.99</i> | ****               | <i>0.99</i> | ****            | <i>0.44</i> | <i>0.99</i>      | <i>1.00</i> |                   | <b>1.00</b> |
|                      | W | <i>0.99</i>       | <i>1.00</i> | <i>0.27</i>        | <i>1.00</i> | <i>1.00</i>       | <i>0.99</i> | ***                  | <i>0.80</i> | ****               | <i>0.80</i> | ****            | ****        | <i>0.71</i>      | *           | <i>0.07</i>       |             |

**Supplementary Table S3.** Detailed results of correlations analyses (Pearson product moment correlation) relating concentrations of individual polyols in overwintering larvae ( $\mu\text{g} \times \text{g}^{-1}$  fresh mass), plus their summed sugars and polyols concentrations (TSPC), to supercooling points (SCP) found for a selection of species of European univoltine Satyrinae butterflies. Concentration values were log-transformed to achieve normality of distributions.

**Eight non-*Erebia* spp.**

|                 | Both treatments (N = 16) |       |      | Autumn (N = 8) |       |      | Winter (N = 16) |       |      |
|-----------------|--------------------------|-------|------|----------------|-------|------|-----------------|-------|------|
|                 | r                        | t     | P    | r              | t     | P    | r               | t     | P    |
| Glycerol        | 0.63                     | 3.03  | **   | 0.82           | 3.55  | *    | 0.47            | 1.32  | 0.23 |
| Ribose          | -0.33                    | -1.30 | 0.21 | -0.43          | -1.17 | 0.29 | -0.20           | -0.49 | 0.64 |
| Arabinitol      | 0.25                     | 0.97  | 0.35 | 0.51           | 1.46  | 0.19 | 0.00            | -0.01 | 1.00 |
| Ribitol         | 0.00                     | 0.00  | 1.00 | -0.08          | -0.19 | 0.86 | 0.12            | 0.29  | 0.78 |
| Fructose        | 0.32                     | 1.27  | 0.22 | 0.45           | 1.22  | 0.27 | 0.21            | 0.52  | 0.62 |
| Glucose         | -0.32                    | -1.25 | 0.23 | -0.58          | -1.76 | 0.13 | 0.15            | 0.38  | 0.71 |
| Manitol         | 0.21                     | 0.81  | 0.43 | 0.32           | 0.83  | 0.44 | 0.12            | 0.31  | 0.77 |
| Sorbitol        | -0.28                    | -1.10 | 0.29 | -0.54          | -1.58 | 0.16 | 0.18            | 0.44  | 0.67 |
| Scyllo-inositol | 0.06                     | 0.23  | 0.82 | -0.42          | -1.12 | 0.31 | 0.47            | 1.32  | 0.24 |
| Myo-inositol    | 0.45                     | 1.87  | +    | 0.56           | 1.68  | 0.14 | 0.26            | 0.65  | 0.54 |
| Saccharose      | 0.53                     | 2.33  | *    | 0.60           | 1.82  | 0.12 | 0.48            | 1.34  | 0.23 |
| Trehalose       | -0.22                    | -0.82 | 0.42 | -0.37          | -0.98 | 0.36 | 0.10            | 0.25  | 0.81 |
| Maltose         | 0.30                     | 1.18  | 0.26 | 0.38           | 1.00  | 0.36 | 0.26            | 0.66  | 0.53 |
| TSPC            | 0.20                     | 0.77  | 0.46 | 0.14           | 0.34  | 0.75 | 0.36            | 0.95  | 0.38 |

**Five *Erebia* spp. [15] added**

|          | Both treatments (N = 25) |      |      | Autumn (N = 13) |       |      | Winter (N = 12) |      |      |
|----------|--------------------------|------|------|-----------------|-------|------|-----------------|------|------|
|          | r                        | t    | P    | r               | t     | P    | r               | t    | P    |
| Glycerol | 0.02                     | 0.10 | 0.92 | -0.03           | -0.10 | 0.92 | 0.15            | 0.48 | 0.64 |

|                 |       |       |      |       |       |      |       |       |      |
|-----------------|-------|-------|------|-------|-------|------|-------|-------|------|
| Ribose          | -0.22 | -1.10 | 0.28 | -0.25 | -0.87 | 0.40 | -0.25 | -0.80 | 0.44 |
| Arabinitol      | 0.15  | 0.71  | 0.49 | 0.04  | 0.13  | 0.90 | 0.25  | 0.83  | 0.43 |
| Ribitol         | 0.05  | 0.23  | 0.82 | -0.01 | -0.03 | 0.98 | 0.11  | 0.37  | 0.72 |
| Fructose        | 0.19  | 0.95  | 0.35 | 0.28  | 0.97  | 0.35 | 0.11  | 0.34  | 0.74 |
| Glucose         | -0.11 | -0.54 | 0.59 | -0.33 | -1.17 | 0.27 | 0.23  | 0.75  | 0.47 |
| Manitol         | 0.14  | 0.68  | 0.50 | 0.18  | 0.61  | 0.55 | 0.07  | 0.22  | 0.83 |
| Sorbitol        | -0.14 | -0.66 | 0.52 | -0.25 | -0.87 | 0.40 | -0.09 | -0.30 | 0.77 |
| Scyllo-inositol | 0.14  | 0.67  | 0.51 | -0.34 | -1.20 | 0.26 | 0.40  | 1.36  | 0.20 |
| Myo-inositol    | 0.40  | 2.12  | *    | 0.52  | 2.03  | +    | 0.20  | 0.65  | 0.53 |
| Saccharose      | 0.45  | 2.44  | *    | 0.56  | 2.27  | *    | 0.38  | 1.30  | 0.22 |
| Trehalose       | -0.13 | -0.62 | 0.54 | -0.25 | -0.84 | 0.42 | 0.00  | -0.01 | 0.99 |
| Maltose         | 0.23  | 1.14  | 0.27 | 0.21  | 0.71  | 0.49 | 0.31  | 1.04  | 0.32 |
| Threitol        | 0.02  | 0.12  | 0.91 | -0.03 | -0.09 | 0.93 | 0.09  | 0.29  | 0.78 |
| Erythritol      | 0.26  | 1.30  | 0.21 | 0.28  | 0.96  | 0.36 | 0.29  | 0.96  | 0.36 |
| TSPC            | 0.06  | 0.31  | 0.76 | 0.02  | 0.08  | 0.94 | 0.13  | 0.40  | 0.70 |

**Supplementary Table S4.** Mean ( $\pm$ SD) concentrations ( $\mu\text{g} \times \text{mg}^{-1}$  fresh mass) of sugars and polyols detected in the eight non-*Erebia* spp. targeted in this study, and six *Erebia* spp. targeted in [15]. Only substances reaching higher concentrations than  $0.1 \mu\text{g} \times \text{mg}^{-1}$  are listed. A and W: Autumn and Winter treatments.

|                      |   | Arabinitol      | Fructose        | Glucose         | Glycerol        | Maltose         | Myo-Inositol    | Ribitol         | Saccharose       | Sorbitol        | Threitol        | Trehalose        |
|----------------------|---|-----------------|-----------------|-----------------|-----------------|-----------------|-----------------|-----------------|------------------|-----------------|-----------------|------------------|
| <i>C. arcania</i>    | A | 0.01 $\pm$ 0.00 | 0.15 $\pm$ 0.04 | 0.45 $\pm$ 0.13 | 0.11 $\pm$ 0.03 | 0.03 $\pm$ 0.02 | 0.07 $\pm$ 0.05 | 0.07 $\pm$ 0.05 | 0.95 $\pm$ 0.82  | 0.02 $\pm$ 0.00 | 0               | 0.04 $\pm$ 0.01  |
|                      | W | 0.01 $\pm$ 0.00 | 0.13 $\pm$ 0.04 | 0.47 $\pm$ 0.24 | 0.09 $\pm$ 0.05 | 0.01 $\pm$ 0.01 | 0.07 $\pm$ 0.04 | 0.04 $\pm$ 0.03 | 1.55 $\pm$ 1.87  | 0.01 $\pm$ 0.00 | 0               | 0.07 $\pm$ 0.04  |
| <i>C. gardetta</i>   | A | 0.01 $\pm$ 0.00 | 0.10 $\pm$ 0.04 | 1.94 $\pm$ 0.93 | 0.07 $\pm$ 0.02 | 0.01 $\pm$ 0.01 | 0.07 $\pm$ 0.04 | 0.03 $\pm$ 0.02 | 0.32 $\pm$ 0.55  | 0.02 $\pm$ 0.01 | 0               | 2.06 $\pm$ 0.36  |
|                      | W | 0.02 $\pm$ 0.01 | 0.23 $\pm$ 0.10 | 1.06 $\pm$ 0.39 | 0.05 $\pm$ 0.02 | 0.00 $\pm$ 0.01 | 0.09 $\pm$ 0.10 | 0.01 $\pm$ 0.00 | 0.01 $\pm$ 0.01  | 0.03 $\pm$ 0.01 | 0               | 1.26 $\pm$ 0.23  |
| <i>M. jurtina</i>    | A | 0.03 $\pm$ 0.01 | 0.17 $\pm$ 0.04 | 0.34 $\pm$ 0.08 | 0.14 $\pm$ 0.02 | 0.01 $\pm$ 0.01 | 0.04 $\pm$ 0.03 | 0.04 $\pm$ 0.04 | 2.26 $\pm$ 0.55  | 0               | 0               | 0.07 $\pm$ 0.02  |
|                      | W | 0.04 $\pm$ 0.01 | 0.61 $\pm$ 0.23 | 1.10 $\pm$ 0.48 | 0.17 $\pm$ 0.04 | 0.03 $\pm$ 0.02 | 0.07 $\pm$ 0.05 | 0.03 $\pm$ 0.03 | 1.25 $\pm$ 0.37  | 0.03 $\pm$ 0.01 | 0               | 0.07 $\pm$ 0.01  |
| <i>A. hyperantus</i> | A | 0.02 $\pm$ 0.01 | 0.18 $\pm$ 0.06 | 0.57 $\pm$ 0.15 | 0.16 $\pm$ 0.03 | 0.03 $\pm$ 0.02 | 0.37 $\pm$ 0.09 | 0.01 $\pm$ 0.00 | 3.22 $\pm$ 0.60  | 0.02 $\pm$ 0.01 | 0               | 1.34 $\pm$ 0.42  |
|                      | W | 0.02 $\pm$ 0.01 | 0.28 $\pm$ 0.09 | 0.85 $\pm$ 0.21 | 0.11 $\pm$ 0.02 | 0               | 0.10 $\pm$ 0.09 | 0.02 $\pm$ 0.01 | 1.44 $\pm$ 0.33  | 0.05 $\pm$ 0.02 | 0               | 1.22 $\pm$ 0.33  |
| <i>M. galathea</i>   | A | 0.02 $\pm$ 0.01 | 0.59 $\pm$ 0.09 | 1.10 $\pm$ 0.32 | 0.19 $\pm$ 0.05 | 0.18 $\pm$ 0.02 | 0.25 $\pm$ 0.12 | 0               | 10.28 $\pm$ 2.75 | 0               | 0               | 0                |
|                      | W | 0.02 $\pm$ 0.00 | 0.78 $\pm$ 0.10 | 1.87 $\pm$ 0.33 | 0.15 $\pm$ 0.03 | 0.15 $\pm$ 0.17 | 0.19 $\pm$ 0.12 | 0.01 $\pm$ 0.01 | 0.68 $\pm$ 0.13  | 0.09 $\pm$ 0.02 | 0               | 0.15 $\pm$ 0.02  |
| <i>M. dryas</i>      | A | 0.01 $\pm$ 0.00 | 0.54 $\pm$ 0.07 | 2.35 $\pm$ 0.52 | 0.06 $\pm$ 0.01 | 0.02 $\pm$ 0.01 | 0.07 $\pm$ 0.03 | 0               | 6.23 $\pm$ 1.93  | 0.07 $\pm$ 0.01 | 0               | 1.31 $\pm$ 0.34  |
|                      | W | 0.02 $\pm$ 0.00 | 0.56 $\pm$ 0.23 | 2.57 $\pm$ 0.87 | 0.07 $\pm$ 0.02 | 0.03 $\pm$ 0.05 | 0.09 $\pm$ 0.03 | 0               | 1.63 $\pm$ 1.16  | 0.16 $\pm$ 0.06 | 0               | 1.00 $\pm$ 0.53  |
| <i>H. semele</i>     | A | 0.01 $\pm$ 0.01 | 0.29 $\pm$ 0.05 | 1.08 $\pm$ 0.54 | 0.11 $\pm$ 0.08 | 0.01 $\pm$ 0.00 | 0.07 $\pm$ 0.07 | 0               | 2.27 $\pm$ 1.68  | 0.03 $\pm$ 0.01 | 0               | 0.33 $\pm$ 0.36  |
|                      | W | 0.01 $\pm$ 0.00 | 0.21 $\pm$ 0.17 | 1.69 $\pm$ 1.59 | 0.07 $\pm$ 0.04 | 0.02 $\pm$ 0.02 | 0.07 $\pm$ 0.04 | 0               | 1.62 $\pm$ 0.94  | 0.04 $\pm$ 0.01 | 0               | 1.50 $\pm$ 1.25  |
| <i>C. briseis</i>    | A | 0.02 $\pm$ 0.01 | 0.04 $\pm$ 0.01 | 3.91 $\pm$ 1.22 | 0.08 $\pm$ 0.03 | 0.01 $\pm$ 0.00 | 0.03 $\pm$ 0.03 | 0               | 0.02 $\pm$ 0.06  | 0.05 $\pm$ 0.01 | 0               | 0.82 $\pm$ 0.59  |
|                      | W | 0.01 $\pm$ 0.01 | 0.04 $\pm$ 0.02 | 1.42 $\pm$ 0.81 | 0.06 $\pm$ 0.02 | 0.01 $\pm$ 0.00 | 0.02 $\pm$ 0.03 | 0               | 0.19 $\pm$ 0.10  | 0.07 $\pm$ 0.04 | 0               | 0.87 $\pm$ 1.41  |
| <i>E. medusa</i>     | A | 0.04 $\pm$ 0.01 | 0.04 $\pm$ 0.02 | 1.29 $\pm$ 0.65 | 0.27 $\pm$ 0.05 | 0.02 $\pm$ 0.07 | 0.03 $\pm$ 0.01 | 0.11 $\pm$ 0.03 | 1.58 $\pm$ 0.66  | 0.00 $\pm$ 0.01 | 0.14 $\pm$ 0.03 | 4.07 $\pm$ 2.26  |
|                      | W | 0.11 $\pm$ 0.04 | 0.10 $\pm$ 0.09 | 2.23 $\pm$ 1.31 | 0.35 $\pm$ 0.09 | 0               | 0.03 $\pm$ 0.01 | 0.10 $\pm$ 0.05 | 1.25 $\pm$ 0.77  | 0.02 $\pm$ 0.02 | 0.10 $\pm$ 0.04 | 1.28 $\pm$ 1.35  |
| <i>E. aethiops</i>   | A | 0.03 $\pm$ 0.03 | 0.35 $\pm$ 0.40 | 0.60 $\pm$ 0.19 | 0.40 $\pm$ 0.15 | 0.02 $\pm$ 0.03 | 0.03 $\pm$ 0.01 | 0.04 $\pm$ 0.01 | 1.25 $\pm$ 0.67  | 0.03 $\pm$ 0.03 | 0.11 $\pm$ 0.03 | 0.88 $\pm$ 1.03  |
|                      | W | 0.09 $\pm$ 0.07 | 0.10 $\pm$ 0.05 | 1.06 $\pm$ 0.44 | 0.57 $\pm$ 0.22 | 0               | 0.01 $\pm$ 0.01 | 0.07 $\pm$ 0.03 | 1.19 $\pm$ 0.49  | 0.04 $\pm$ 0.04 | 0.10 $\pm$ 0.03 | 11.90 $\pm$ 3.12 |
| <i>E. pronoe</i>     | A | 0.02 $\pm$ 0.02 | 0.08 $\pm$ 0.03 | 0.42 $\pm$ 0.03 | 0.68 $\pm$ 0.10 | 0.13 $\pm$ 0.02 | 0.02 $\pm$ 0.02 | 0.01 $\pm$ 0.01 | 0.69 $\pm$ 0.27  | 0.01 $\pm$ 0.02 | 0.07 $\pm$ 0.03 | 0.95 $\pm$ 0.28  |
|                      | W | 0.11 $\pm$ 0.03 | 0.09 $\pm$ 0.03 | 0.99 $\pm$ 0.34 | 0.86 $\pm$ 0.05 | 0               | 0.04 $\pm$ 0.01 | 0.05 $\pm$ 0.01 | 0.96 $\pm$ 0.27  | 0.01 $\pm$ 0.02 | 0.13 $\pm$ 0.02 | 8.68 $\pm$ 0.88  |
| <i>E. cassioides</i> | A | 0.04 $\pm$ 0.02 | 0.02 $\pm$ 0.02 | 0.43 $\pm$ 0.09 | 0.51 $\pm$ 0.08 | 0               | 0.02 $\pm$ 0.01 | 0.06 $\pm$ 0.02 | 0.45 $\pm$ 0.17  | 0               | 0.12 $\pm$ 0.04 | 11.28 $\pm$ 2.40 |
|                      | W | 0.05 $\pm$ 0.02 | 0.02 $\pm$ 0.02 | 0.61 $\pm$ 0.24 | 0.63 $\pm$ 0.06 | 0               | 0.01 $\pm$ 0.01 | 0.08 $\pm$ 0.02 | 0.34 $\pm$ 0.24  | 0               | 0.13 $\pm$ 0.05 | 11.83 $\pm$ 3.64 |
| <i>E. pluto</i>      | A | 0.15 $\pm$ 0.12 | 0.17 $\pm$ 0.06 | 0.40 $\pm$ 0.20 | 2.40 $\pm$ 2.75 | 0.04 $\pm$ 0.05 | 0.04 $\pm$ 0.01 | 0.05 $\pm$ 0.01 | 1.44 $\pm$ 0.20  | 0.10 $\pm$ 0.03 | 0.09 $\pm$ 0.07 | 13.19 $\pm$ 1.90 |

**Supplementary Figure S1.** CCA ordination biplots (with first and second ordination axes) showing the sugars and polyols profiles in the eight non-*Erebia* (left) and satyrines including *Erebia* (right) if effect of treatment (Autumn vs. Winter) was filtered out as covariable (top), and if identities of species were treated as covariables (bottom). The letters H, I, and L denote High, Intermediate, or Low concentrations of individual polyols.

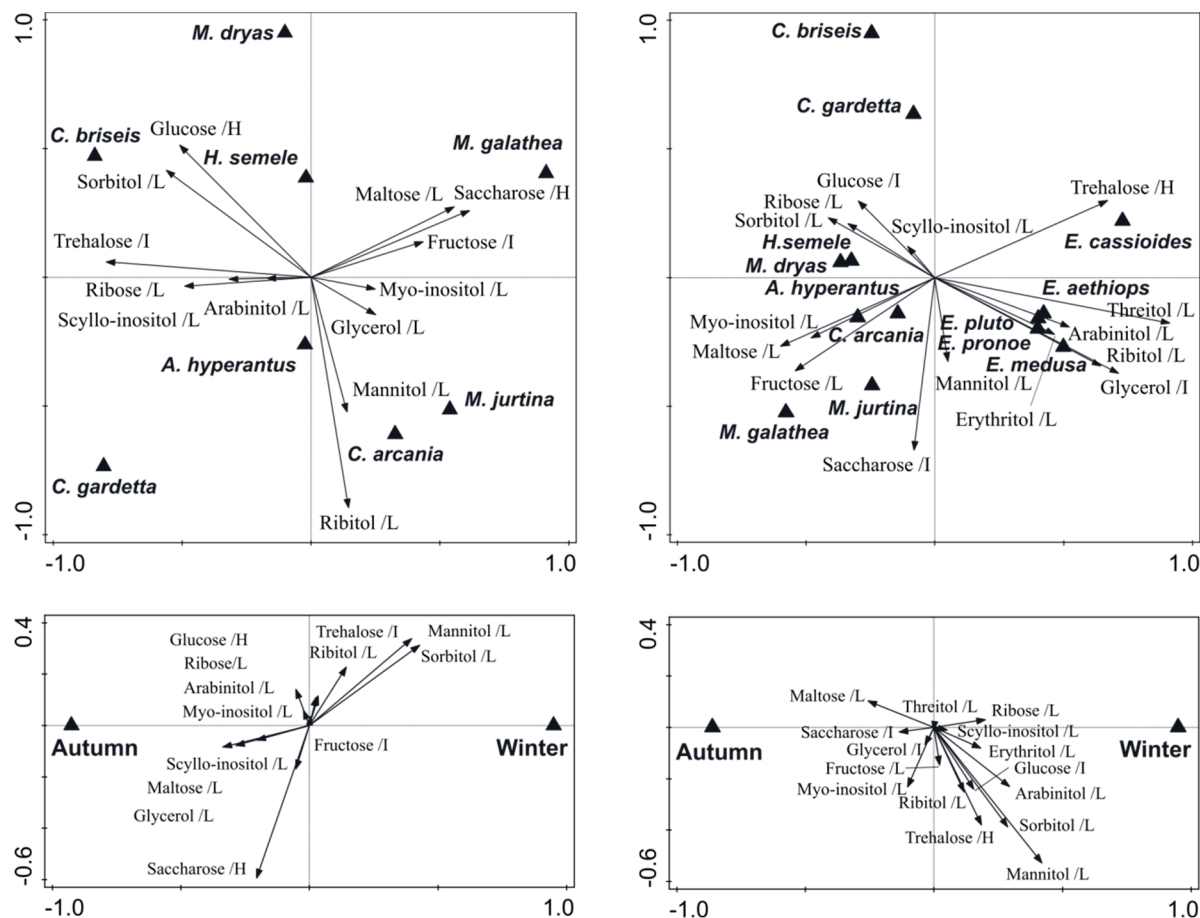

Supplement: s1 [file s1]
